# Supplementary material for: Centrally mediated responses to NMES are influenced by muscle group and stimulation parameters
Source: PubMed Central journal article supplement (PMC11496505; doi:10.1038/s41598-024-75145-2), 2024-10-22
Supplement: 41598_2024_75145_MOESM1_ESM.pdf [file 41598_2024_75145_MOESM1_ESM.pdf]

# Centrally-mediated responses to NMES are influenced by muscle group and stimulation parameters

Timothée Popesco<sup>1</sup>, Quentin Gardet<sup>1</sup>, Jonathan Bossard<sup>1</sup>, Nicola A. Maffiuletti<sup>2</sup> and Nicolas Place<sup>1</sup>

<sup>1</sup>Institute of Sport Sciences, University of Lausanne, 1015 Lausanne, Switzerland

<sup>2</sup> Human Performance Lab, Schulthess Clinic, Zurich, Switzerland

## Supplementary Information

Supplementary Table 1. Comparison of mean force and discomfort between muscle groups by stimulation frequency.

|                           | PF                        | KE                        | EF                       | P value |
|---------------------------|---------------------------|---------------------------|--------------------------|---------|
| Mean force 20 Hz (% MVC)  | 13.2 ± 3.8                | 11.9 ± 4.2                | 12.7 ± 5.4               | 0.071   |
| Mean force 50 Hz (% MVC)  | 16.4 ± 7.3 <sup>c</sup>   | 15.7 ± 10.7 <sup>c</sup>  | 12.9 ± 4.4 <sup>ab</sup> | 0.005   |
| Mean force 100 Hz (% MVC) | 19.1 ± 11.3 <sup>bc</sup> | 15.8 ± 12.7 <sup>ac</sup> | 12.6 ± 8.3 <sup>ab</sup> | <0.001  |
| Mean force 147 Hz (% MVC) | 18.1 ± 8.9 <sup>bc</sup>  | 15.2 ± 10.8 <sup>ac</sup> | 12.1 ± 6.1 <sup>ab</sup> | <0.001  |
| Discomfort 20 Hz (VAS)    | 0.7 ± 0.8 <sup>bc</sup>   | 1.8 ± 1.2 <sup>ac</sup>   | 2.9 ± 2.0 <sup>ab</sup>  | <0.001  |
| Discomfort 50 Hz (VAS)    | 0.8 ± 0.7                 | 2.0 ± 1.8                 | 2.9 ± 7.9                | 0.077   |
| Discomfort 100 Hz (VAS)   | 1.0 ± 1.0 <sup>bc</sup>   | 2.3 ± 2.8 <sup>a</sup>    | 1.8 ± 1.1 <sup>a</sup>   | <0.001  |
| Discomfort 147 Hz (VAS)   | 1.0 ± 0.9 <sup>bc</sup>   | 2.1 ± 2.0 <sup>ac</sup>   | 1.7 ± 4.2 <sup>ab</sup>  | <0.001  |

PF: plantar flexors; KE: knee extensors; EF: elbow flexors. a = different from PF, b = different from KE, c = different from EF.

Supplementary Table 2. Comparison of mean force and discomfort between muscle groups by pulse duration

|                           | <b>PF</b>                | <b>KE</b>                 | <b>EF</b>                | <b>P value</b> |
|---------------------------|--------------------------|---------------------------|--------------------------|----------------|
| Mean force 0.2 ms (% MVC) | 14.4 ± 8.2               | 14.1 ± 8.0                | 12.5 ± 5.6               | 0.115          |
| Mean force 1 ms (% MVC)   | 17.6 ± 8.4 <sup>bc</sup> | 14.8 ± 11.3 <sup>ac</sup> | 12.6 ± 5.7 <sup>ab</sup> | <0.001         |
| Mean force 2 ms (% MVC)   | 18.1 ± 9.8 <sup>bc</sup> | 15.1 ± 12.6 <sup>a</sup>  | 12.6 ± 6.9 <sup>a</sup>  | <0.001         |
| Discomfort 0.2 ms (VAS)   | 0.6 ± 0.6 <sup>bc</sup>  | 1.9 ± 2.4 <sup>a</sup>    | 2.8 ± 6.9 <sup>a</sup>   | 0.011          |
| Discomfort 1 ms (VAS)     | 0.9 ± 0.9 <sup>bc</sup>  | 2.1 ± 1.6 <sup>a</sup>    | 2.1 ± 1.5 <sup>a</sup>   | <0.001         |
| Discomfort 2 ms (VAS)     | 1.0 ± 0.9 <sup>bc</sup>  | 2.2 ± 1.8 <sup>a</sup>    | 2.0 ± 1.5 <sup>a</sup>   | <0.001         |

PF: plantar flexors; KE: knee extensors; EF: elbow flexors. a = different from PF, b = different from KE, c = different from EF.

Supplementary Table 3. Linear mixed model statistics inter-frequency

| Fixed effect tests                   |                               | F     | Degrees of freedom | P value           |
|--------------------------------------|-------------------------------|-------|--------------------|-------------------|
| <b>Extra force 20 Hz</b>             | <i>Muscle group</i>           | 0.61  | 2                  | 0.547             |
|                                      | Pulse duration                | 1.06  | 2                  | 0.349             |
|                                      | Muscle group x Pulse duration | 0.25  | 4                  | 0.907             |
| <b>Extra force 50 Hz</b>             | <i>Muscle group</i>           | 1.50  | 2                  | 0.228             |
|                                      | Pulse duration                | 3.64  | 2                  | <b>0.029</b>      |
|                                      | Muscle group x Pulse duration | 1.39  | 4                  | 0.242             |
| <b>Extra force 100 Hz</b>            | <i>Muscle group</i>           | 0.17  | 2                  | 0.840             |
|                                      | Pulse duration                | 10.14 | 2                  | <b>&lt; 0.001</b> |
|                                      | Muscle group x Pulse duration | 0.25  | 4                  | 0.908             |
| <b>Extra force 147 Hz</b>            | <i>Muscle group</i>           | 0.65  | 2                  | 0.521             |
|                                      | Pulse duration                | 8.77  | 2                  | <b>&lt; 0.001</b> |
|                                      | Muscle group x Pulse duration | 0.507 | 4                  | 0.731             |
| <b>Sustained EMG activity 20 Hz</b>  | <i>Muscle group</i>           | 1.89  | 2                  | 0.156             |
|                                      | Pulse duration                | 7.44  | 2                  | <b>&lt; 0.001</b> |
|                                      | Muscle group x Pulse duration | 1.58  | 4                  | 0.184             |
| <b>Sustained EMG activity 50 Hz</b>  | <i>Muscle group</i>           | 1.13  | 2                  | 0.325             |
|                                      | Pulse duration                | 13.25 | 2                  | <b>&lt; 0.001</b> |
|                                      | Muscle group x Pulse duration | 0.33  | 4                  | 0.860             |
| <b>Sustained EMG activity 100 Hz</b> | <i>Muscle group</i>           | 0.74  | 2                  | 0.477             |
|                                      | Pulse duration                | 17.63 | 2                  | <b>&lt; 0.001</b> |
|                                      | Muscle group x Pulse duration | 1.06  | 4                  | 0.377             |
| <b>Sustained EMG activity 147 Hz</b> | <i>Muscle group</i>           | 1.62  | 2                  | 0.201             |
|                                      | Pulse duration                | 14.77 | 2                  | <b>&lt; 0.001</b> |
|                                      | Muscle group x Pulse duration | 1.27  | 4                  | 0.287             |

|                          |                               |       |   |                   |
|--------------------------|-------------------------------|-------|---|-------------------|
| <b>Mean force 20 Hz</b>  | <i>Muscle group</i>           | 2.67  | 2 | 0.073             |
|                          | Pulse duration                | 0.56  | 2 | 0.571             |
|                          | Muscle group x Pulse duration | 0.83  | 4 | 0.510             |
| <b>Mean force 50 Hz</b>  | <i>Muscle group</i>           | 5.73  | 2 | <b>0.004</b>      |
|                          | Pulse duration                | 2.71  | 2 | 0.070             |
|                          | Muscle group x Pulse duration | 1.45  | 4 | 0.222             |
| <b>Mean force 100 Hz</b> | <i>Muscle group</i>           | 8.84  | 2 | <b>&lt; 0.001</b> |
|                          | Pulse duration                | 1.68  | 2 | 0.190             |
|                          | Muscle group x Pulse duration | 0.60  | 4 | 0.663             |
| <b>Mean force 147 Hz</b> | <i>Muscle group</i>           | 10.29 | 2 | <b>&lt; 0.001</b> |
|                          | Pulse duration                | 0.74  | 2 | 0.478             |
|                          | Muscle group x Pulse duration | 0.77  | 4 | 0.546             |
| <b>Discomfort 20 Hz</b>  | <i>Muscle group</i>           | 43.99 | 2 | <b>&lt; 0.001</b> |
|                          | Pulse duration                | 0.69  | 2 | 0.506             |
|                          | Muscle group x Pulse duration | 0.28  | 4 | 0.889             |
| <b>Discomfort 50 Hz</b>  | <i>Muscle group</i>           | 2.58  | 2 | 0.080             |
|                          | Pulse duration                | 0.27  | 2 | 0.761             |
|                          | Muscle group x Pulse duration | 0.99  | 4 | 0.416             |
| <b>Discomfort 100 Hz</b> | <i>Muscle group</i>           | 7.30  | 2 | <b>0.001</b>      |
|                          | Pulse duration                | 0.01  | 2 | 0.992             |
|                          | Muscle group x Pulse duration | 0.64  | 4 | 0.633             |
| <b>Discomfort 147 Hz</b> | <i>Muscle group</i>           | 16.97 | 2 | <b>&lt; 0.001</b> |
|                          | Pulse duration                | 0.87  | 2 | 0.423             |
|                          | Muscle group x Pulse duration | 0.62  | 4 | 0.647             |

Significant p values are displayed in bold.

Supplementary Table 4. Linear mixed model statistics inter-Muscle group

|                                      |                               | <b>F</b> | <b>Degrees of freedom</b> | <b>P value</b>    |
|--------------------------------------|-------------------------------|----------|---------------------------|-------------------|
| <b>Fixed effect tests</b>            |                               |          |                           |                   |
| <b>Extra force 0.2 ms</b>            | <i>Muscle group</i>           | 2.84     | 2                         | 0.062             |
|                                      | Stim frequency                | 1.43     | 3                         | 0.236             |
|                                      | Muscle group x Stim frequency | 1.17     | 6                         | 0.325             |
| <b>Extra force 1 ms</b>              | <i>Muscle group</i>           | 12.07    | 2                         | <b>&lt; 0.001</b> |
|                                      | Stim frequency                | 1.09     | 3                         | 0.354             |
|                                      | Muscle group x Stim frequency | 1.24     | 6                         | 0.289             |
| <b>Extra force 2 ms</b>              | <i>Muscle group</i>           | 6.69     | 2                         | <b>0.002</b>      |
|                                      | Stim frequency                | 1.18     | 3                         | 0.318             |
|                                      | Muscle group x Stim frequency | 0.97     | 6                         | 0.450             |
| <b>Sustained EMG activity 0.2 ms</b> | <i>Muscle group</i>           | 13.47    | 2                         | <b>&lt; 0.001</b> |
|                                      | Stim frequency                | 3.87     | 3                         | <b>0.010</b>      |
|                                      | Muscle group x Stim frequency | 1.32     | 6                         | 0.250             |
| <b>Sustained EMG activity 1 ms</b>   | <i>Muscle group</i>           | 15.86    | 2                         | <b>&lt; 0.001</b> |
|                                      | Stim frequency                | 5.23     | 3                         | <b>0.002</b>      |
|                                      | Muscle group x Stim frequency | 0.86     | 6                         | 0.523             |
| <b>Sustained EMG activity 2 ms</b>   | <i>Muscle group</i>           | 25.50    | 2                         | <b>&lt; 0.001</b> |
|                                      | Stim frequency                | 3.21     | 3                         | <b>0.025</b>      |
|                                      | Muscle group x Stim frequency | 0.95     | 6                         | 0.461             |
| <b>Mean force 0.2 ms</b>             | <i>Muscle group</i>           | 2.19     | 2                         | 0.115             |
|                                      | Stim frequency                | 1.43     | 3                         | 0.235             |
|                                      | Muscle group x Stim frequency | 0.80     | 6                         | 0.573             |
| <b>Mean force 1 ms</b>               | <i>Muscle group</i>           | 11.84    | 2                         | <b>&lt; 0.001</b> |
|                                      | Stim frequency                | 4.08     | 3                         | <b>0.008</b>      |
|                                      | Muscle group x Stim frequency | 1.33     | 6                         | 0.246             |

|                          |                               |       |   |                   |
|--------------------------|-------------------------------|-------|---|-------------------|
| <b>Mean force 2 ms</b>   | <i>Muscle group</i>           | 9.88  | 2 | <b>&lt; 0.001</b> |
|                          | Stim frequency                | 3.17  | 3 | <b>0.026</b>      |
|                          | Muscle group x Stim frequency | 1.36  | 6 | 0.235             |
| <b>Discomfort 0.2 ms</b> | <i>Muscle group</i>           | 4.57  | 2 | <b>0.012</b>      |
|                          | Stim frequency                | 0.42  | 3 | 0.739             |
|                          | Muscle group x Stim frequency | 0.99  | 6 | 0.433             |
| <b>Discomfort 1 ms</b>   | <i>Muscle group</i>           | 23.98 | 2 | <b>&lt; 0.001</b> |
|                          | Stim frequency                | 0.44  | 3 | 0.724             |
|                          | Muscle group x Stim frequency | 2.21  | 6 | <b>0.045</b>      |
| <b>Discomfort 2 ms</b>   | <i>Muscle group</i>           | 17.56 | 2 | <b>&lt; 0.001</b> |
|                          | Stim frequency                | 0.362 | 3 | 0.780             |
|                          | Muscle group x Stim frequency | 2.58  | 6 | <b>0.020</b>      |

Significant p values are displayed in bold.
